# Supplementary material for: Global Emissions Inventory from Open Biomass Burning (GEIOBB): Utilizing Fengyun–3D global fire spot monitoring data
Source: Copernicus journal article supplement (doi:10.5194/essd-2023-527), 2024-01-03
Supplement: Supplementary file 1 [file essd-2023-527-supplement.pdf]

## Section S1

A major influence on fire discharge in the framework is the condition of the subsurface at the location of the fire event. Different types of subsurface have different biological qualities and correlates. In GEIOBB we used IGBP categorized data from MODIS LCT (Friedl and Sulla-Menashe, 2022) and we reclassified the original 17 classifications and reclassified the results to reorganize the subsurface types into seven categories (Table 1, reclassification approach), including grasslands and savannas, woody savannas or shrubs, tropical forests, temperate forests, boreal forests, temperate evergreen forests, and crops, to allow for better matching in subsequent assignments of biomass and related factors.

**Table S1.** Reclassification method.

| IGBP LCT Description                | LCT Value | Method and Value                                                                                                    |
|-------------------------------------|-----------|---------------------------------------------------------------------------------------------------------------------|
| Evergreen Needleleaf Forests        | 1         | If latitude > 50, then V5; else V6                                                                                  |
| Evergreen Broadleaf Forests         | 2         | If latitude > -23.5 and < 23.5, then V3; else V4                                                                    |
| Deciduous Needleleaf Forests        | 3         | If latitude > 50, then V5; else V4                                                                                  |
| Deciduous Broadleaf Forests         | 4         | V4                                                                                                                  |
| Mixed Forests                       | 5         | If latitude > 50, then V5; if latitude > -23.5 and < 23.5, then V3; else V4                                         |
| Closed Shrublands                   | 6         | V2                                                                                                                  |
| Open Shrublands                     | 7         | V2                                                                                                                  |
| Woody Savannas                      | 8         | V2                                                                                                                  |
| Savannas                            | 9         | V1                                                                                                                  |
| Grasslands                          | 10        | V1                                                                                                                  |
| Permanent Wetlands                  | 11        | V1                                                                                                                  |
| Croplands                           | 12        | V7                                                                                                                  |
| Urban and Built-up Lands            | 13        | If tree cover < 40, then V1; if tree cover > 40 and < 60, then V2; if tree cover > 60 then assign to Mixed Forests. |
| Cropland/Natural Vegetation Mosaics | 14        | V1                                                                                                                  |
| Permanent Snow and Ice              | 15        | -                                                                                                                   |
| Barren                              | 16        | V1                                                                                                                  |
| Water Bodies                        | 17        | -                                                                                                                   |

Where V1 is grasslands and savannas, V2 is woody savannas or shrubs, V3 is tropical forests, V4 is temperate forests, V5 is boreal forests, V6 is temperate evergreen forests, and V7 is crops.

## Section S2

$$F(x, t) = \left( \frac{NDVI_{now}}{NDVI_{2010}} + \frac{TC_{now}}{TC_{2010}} \right) * AGB \quad (1)$$

Where  $NDVI_{now}$  is the mean value of the month before a single fire event,  $NDVI_{2010}$  is the mean value of  $NDVI$  in 2020,  $TC_{now}$  is the tree cover in the year of the fire incident,  $TC_{2010}$  is the tree cover in 2020, and  $AGB$  is the Above Ground Biomass data in 2010.

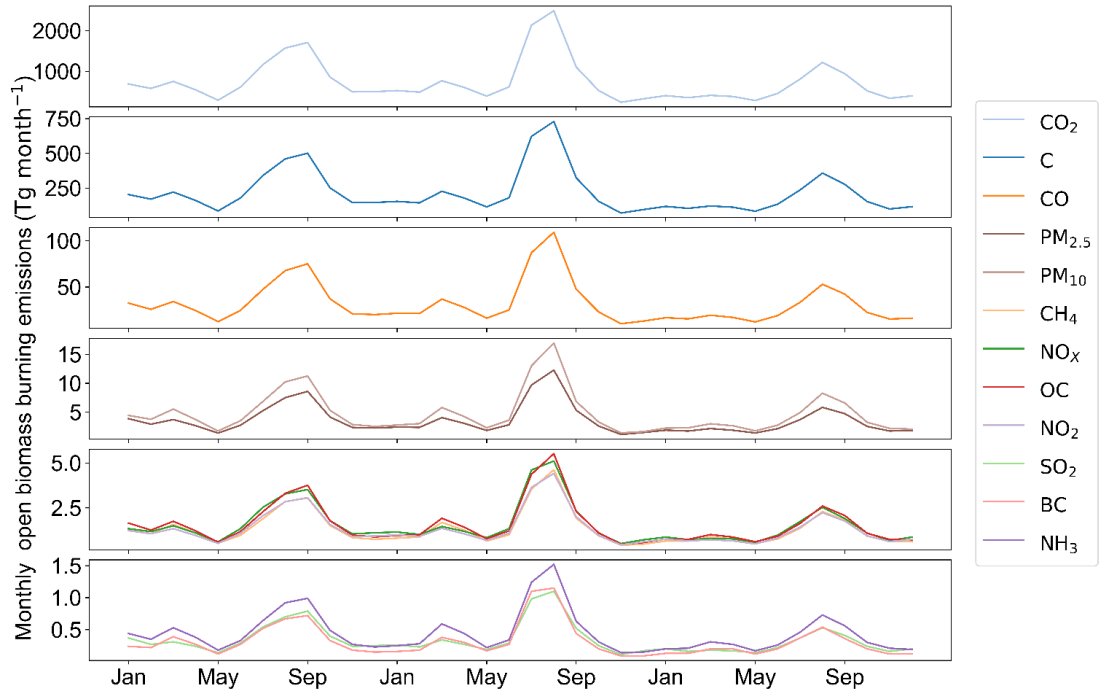

**Figure S1: Global monthly variations of OBB emissions from 2020 to 2022.**
